# Supplementary material
Source: publisher site journal article supplement (https://www.dovepress.com/article/435900)
Supplement: Supplementary file 1 [file get_supplementary_file.php]

## Figure S1: Questionnaire for patients with vitiligo-associated leukotrichia

Patient Number: \_\_\_\_\_ Investigator: \_\_\_\_\_  
 Consultation Card Number: \_\_\_\_\_ Date of Investigation: \_\_\_\_\_  
 Phone No.: \_\_\_\_\_

### Notes

1. This study aims to investigate the clinical features of patients with vitiligo. Doctors and researchers should review, collect, and sign the questionnaire, and all the participants in this project promise to keep privacy and confidentiality for patients throughout the process.

### Part A : Epidemiological questionnaire for vitiligo patients

#### 1. Personal information

A1. Age:  (years)

A2. Weight (kg) / height (m) <sup>2</sup>=BMI: \_\_\_\_ kg/\_\_\_\_m<sup>2</sup>

A3. Gender: (a) = male (b) = female

A4. Fitzpatrick classification: Type  I, Type II  Type III, Type III, Type  Type IV, Type  V

#### 2. Clinical features related to vitiligo

B1. Age of onset:  years

B2. Disease duration:  months

B3. Presence and absence of emotional triggers prior to onset: (a) \_\_\_\_ (b) no

B4. Staging (a) Progression (b) Stabilization

B5. Whether a homomorphic reaction occurs: (a) = Yes (c) = None

B6. Vitiligo classification: (a) segmental type (b) non-segmental type: 1 = sporadic, 2 = generalized, 3 = facial and neck type, 4 = acral type, 5 = mucosal type (c) mixed type (d) undetermined type

B7. With or without halo nevi: (a) Yes (b) No

B8. With or without mucosal involvement: (a) Yes (b) No

B9. Associated hair whitening: (a) Yes (b) No

#### 3. Medical history

C1. Personal History: (a) = Yes (b) = None (None i.e. skip the entry)  autoimmune thyroid disease (such as hyperthyroidism, hypothyroidism, Hashimoto thyroiditis, etc.)  diabetes  pernicious anemia  lupus erythematosus  scleroderma  atopic dermatitis  psoriasis  alopecia areata  premature gray hair  other \_\_\_\_

C2. Family history:

C2.1. Family history of vitiligo (direct line, collateral blood relatives within three generations): (a)=Yes (b)=Non

C2.2. Family history of pre-born gray hair (direct line, collateral blood relatives within three generations): (a)=Yes (b)=None

C2.3. Family history of autoimmune disease (direct line, within three generations of collateral blood relatives): (a) = Yes (b) = none

| VETFa Table -            | Site% | Staging (0-4) | Spreading (-1, +1) |
|--------------------------|-------|---------------|--------------------|
| D1. Head and neck (0-9%) |       |               |                    |
| D2. Torso (0-36%)        |       |               |                    |

|                               |  |  |  |
|-------------------------------|--|--|--|
| D3. Upper extremities (0-18%) |  |  |  |
| D4. Lower extremities (0-36%) |  |  |  |
| D5. Hand and Foot /           |  |  |  |
| D6. Total (0-100%)            |  |  |  |

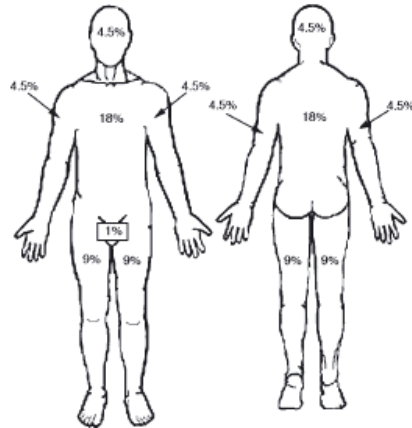

Please mark the white spots/white hair and halo mole areas in the picture

### Part B Clinical features and treatment status of VAL

E. Hair affected sites: (a) terminal hairs (b) hairs (c) both affected

E1. If terminal hair is affected: (a) Yes 1. Scalp 2. Eyebrows 3. Eyelashes 4. Beard 5. Nose hair 6. Armpit hair 7. Pubic hair 8. Leg hair 9. Others (b) No

E2. Hair involvement: (a) Yes (b) No E3. Patients suffer  terminal hairs in total

#### Head and face VAL

F1. Hair affected: (a) hair (b) eyebrows (c) eyelashes (d) beard (e) nose hair

F2. Hair whitening ratio or density: % or  sticks/cm<sup>2</sup>

F3. Hair whitening time:  month

F4. Leukoplakia affected: %

F5. Whether the basal has macroscopic leukoplakia: (a) yes (b) no

F6. Whether leukoplakia is found on physical examination: (a) Yes (b) No

F7. Order of white hair and white spots: (a) white patches before white hair (b) simultaneous detection (c) white hair before white spots (d) not paying attention

F8. Whether gray hair is treated and how it is treated: (a) not yet treated (b) drugs (c) phototherapy (d) surgery (e) drugs combined with phototherapy (f) other

F9. Reasons why gray hair is not treated: \_\_\_\_\_ How effective is gray hair: (a) no double color (b) degree of double color 1-25% (c) degree of double color 26-50% (d) degree of double color 51-75% (e) Degree of polychromism 76-100%

#### Wood lamp inspection

F10. Whether white spot fluorescence at the base of gray hair is enhanced: (a) Yes (b) No

F11. Whether white fluorescence is enhanced: (a) Yes (b) No

F12. Whether the white spot boundary is clear: (a) Yes (b) No

F13. Whether the leukoplakia is completely discolored: (a) Yes (b) No

F14. Remark \_\_\_\_\_

Non-head and facial vitiligo and white hair

G1. Hair affected: (a) axillary hair (b) pubic hair (c) leg hair (d) other \_\_\_\_\_

G2. Leukoplakia course: □□□ months

G3. Leukoplasia and leukoplakia appear in order: (a) leukoplakia precedes leukoplasia (b) found simultaneously (c) white hair precedes leukoplakia (d) not concerned

Wood lamp inspection

G4. Whether white spot fluorescence at the base of gray hair is enhanced: (a) Yes (b) No

G5. Enhancement of white fluorescence: (a) Yes (b) No

G6. Whether the white spot boundary is clear: (a) Yes (b) No

G7. Whether the leukoplakia is completely discolored: (a) Yes (b) No

G8. Remark \_\_\_\_\_
